# Supplementary material
Source: Research Square preprint supplement (doi:10.21203/rs.3.rs-9873079/v1)
Supplement: Supplementary file 1 [file 64c38ccd7635bccf14c45688.docx]

| Variable | HR | 95% CI | p (bootstrap) |
| --- | --- | --- | --- |
| Stage III (vs I-II) | 0.94 | 0.87-1.00 | 0.033 |
| Stage IV (vs I-II) | 1.26 | 1.22-1.31 | < 0.001 |
| EGFR mutated (vs wildtype) | 0.96 | 0.91-1.04 | 0.200 |
| PD‑L1 low (vs negative) | 0.99 | 0.93-1.06 | 0.700 |
| PD‑L1 high (vs negative) | 1.04 | 0.99-1.09 | 0.167 |
| gETU (per 1 SD) | 1.41 | 1.30-1.52 | < 0.001 |

**Supplementary Table S1A.** Sensitivity analysis (ridge Cox, bootstrap CI): Overall survival with stage grouped as I-II / III / IV
