# Supplementary material
Source: Research Square preprint supplement (doi:10.21203/rs.3.rs-9873079/v1)
Supplement: Supplementary file 2 [file cf5496e6a839c68bf1d273fa.docx]

| Variable | HR | 95% CI | p (bootstrap) |
| --- | --- | --- | --- |
| Stage III (vs I-II) | 0.88 | 0.82-0.93 | < 0.001 |
| Stage IV (vs I-II) | 1.36 | 1.33-1.38 | < 0.001 |
| EGFR mutated (vs wildtype) | 0.99 | 0.94-1.03 | 0.667 |
| PD‑L1 low (vs negative) | 0.98 | 0.93-1.04 | 0.650 |
| PD‑L1 high (vs negative) | 1.02 | 0.97-1.07 | 0.333 |
| gETU (per 1 SD) | 1.48 | 1.35-1.54 | < 0.001 |

**Supplementary Table S1B.** Sensitivity analysis (ridge Cox, bootstrap CI): Progression free survival with stage grouped as I-II / III / IV
